# Supplementary material for: Olfactory Stimuli Increase Presence in Virtual Environments
Source: PubMed Central journal article supplement (PMC4910977; doi:10.1371/journal.pone.0157568), 2016-06-16
Supplement: pone.0157568.s003.pdf [file pone.0157568.s003.pdf]

### SECTION 1: Identification of the substance/mixture and of the company/undertaking

#### 1.1. Product identifier

Name : COTTON CANDY FRAGRANCE 2662

#### 1.2. Relevant identified uses of the substance or mixture and uses advised against

Use of the substance/mixture : Industrial uses: Uses of substances as such or in preparations\* at industrial sites

#### 1.3. Details of the supplier of the safety data sheet

Berje  
700 Blair Road  
Carteret, NJ 07008 - USA  
T 973-748-8980 - F 973-680-9618  
[berje@berjeinc.com](mailto:berje@berjeinc.com) - [www.berjeinc.com](http://www.berjeinc.com)

#### 1.4. Emergency telephone number

Emergency number : 1-800-424-9300 24 Hours Emergency Chemtrec. ERR - CCN2624

### SECTION 2: Hazards identification

#### 2.1. Classification of the substance or mixture

##### GHS-US classification

|                     |      |
|---------------------|------|
| Acute Tox. 4 (Oral) | H302 |
| Skin Sens. 1        | H317 |
| Aquatic Acute 2     | H401 |
| Aquatic Chronic 2   | H411 |

Full text of H-phrases: see section 16

#### 2.2. Label elements

##### GHS-US labelling

Hazard pictograms (GHS-US) :

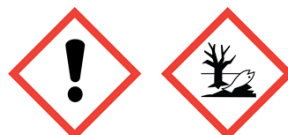

GHS07

GHS09

Signal word (GHS-US) : Warning

Hazard statements (GHS-US) : H302 - Harmful if swallowed  
H317 - May cause an allergic skin reaction  
H401 - Toxic to aquatic life  
H411 - Toxic to aquatic life with long lasting effects

Precautionary statements (GHS-US) : P261 - Avoid breathing dust/fume/gas/mist/vapours/spray  
P264 - Wash hands thoroughly after handling  
P270 - Do not eat, drink or smoke when using this product  
P272 - Contaminated work clothing must not be allowed out of the workplace  
P273 - Avoid release to the environment  
P280 - Wear protective gloves/protective clothing/eye protection  
P301+P312 - IF SWALLOWED: call a POISON CENTER or doctor/physician if you feel unwell  
P302+P352 - IF ON SKIN: Wash with plenty of soap and water  
P321 - Specific treatment (see ... on this label)  
P330 - Rinse mouth  
P333+P313 - If skin irritation or rash occurs: Get medical advice/attention  
P362+P364 - Take off contaminated clothing and wash it before reuse  
P391 - Collect spillage  
P501 - Dispose in a safe manner in accordance with local/national regulations

#### 2.3. Other hazards

No additional information available

#### 2.4. Unknown acute toxicity (GHS-US)

Not applicable

# COTTON CANDY FRAGRANCE 2662

## Safety Data Sheet

according to Federal Register / Vol. 77, No. 58 / Monday, March 26, 2012 / Rules and Regulations

### SECTION 3: Composition/information on ingredients

#### 3.1. Substance

Not applicable

#### 3.2. Mixture

| Name                  | Product identifier | %       | GHS-US classification                                                         |
|-----------------------|--------------------|---------|-------------------------------------------------------------------------------|
| Benzyl benzoate       | (CAS No) 120-51-4  | 50 - 65 | Acute Tox. 4 (Oral), H302<br>Aquatic Acute 2, H401<br>Aquatic Chronic 2, H411 |
| ETHYL VANILLIN        | (CAS No) 121-32-4  | 5 - 10  | Acute Tox. 4 (Oral), H302<br>Aquatic Acute 3, H402                            |
| ETHYL MALTOL          | (CAS No) 4940-11-8 | 5 - 10  | Acute Tox. 4 (Oral), H302                                                     |
| Coumarin              | (CAS No) 91-64-5   | 5 - 10  | Acute Tox. 4 (Oral), H302<br>Skin Sens. 1B, H317                              |
| p-Methoxybenzaldehyde | (CAS No) 123-11-5  | 1 - 5   | Acute Tox. 4 (Oral), H302<br>Skin Irrit. 2, H315<br>Aquatic Acute 3, H402     |
| B.H.T.                | (CAS No) 128-37-0  | 1 - 5   | Acute Tox. 4 (Oral), H302<br>Aquatic Acute 1, H400<br>Aquatic Chronic 1, H410 |

Full text of H-phrases: see section 16

### SECTION 4: First aid measures

#### 4.1. Description of first aid measures

- First-aid measures general : Never give anything by mouth to an unconscious person. If you feel unwell, seek medical advice (show the label where possible).
- First-aid measures after inhalation : Allow victim to breathe fresh air. Allow the victim to rest.
- First-aid measures after skin contact : Remove affected clothing and wash all exposed skin area with mild soap and water, followed by warm water rinse. Wash with plenty of soap and water. If skin irritation or rash occurs: Get medical advice/attention. Specific treatment (see ... on this label). Wash contaminated clothing before reuse.
- First-aid measures after eye contact : Rinse cautiously with water for several minutes. Remove contact lenses, if present and easy to do. Continue rinsing. If eye irritation persists: Get medical advice/attention.
- First-aid measures after ingestion : Rinse mouth. Do NOT induce vomiting. Obtain emergency medical attention. Call a POISON CENTER or doctor/physician if you feel unwell.

#### 4.2. Most important symptoms and effects, both acute and delayed

- Symptoms/injuries after inhalation : May cause an allergic skin reaction.
- Symptoms/injuries after eye contact : Causes serious eye irritation.
- Symptoms/injuries after ingestion : Swallowing a small quantity of this material will result in serious health hazard.

#### 4.3. Indication of any immediate medical attention and special treatment needed

No additional information available

### SECTION 5: Firefighting measures

#### 5.1. Extinguishing media

- Suitable extinguishing media : dry chemical powder. Foam. Dry powder. Carbon dioxide. Water spray. Sand.
- Unsuitable extinguishing media : Do not use a heavy water stream.

#### 5.2. Special hazards arising from the substance or mixture

No additional information available

#### 5.3. Advice for firefighters

- Firefighting instructions : Use water spray or fog for cooling exposed containers. Exercise caution when fighting any chemical fire. Prevent fire-fighting water from entering environment.
- Protection during firefighting : Do not enter fire area without proper protective equipment, including respiratory protection.

### SECTION 6: Accidental release measures

#### 6.1. Personal precautions, protective equipment and emergency procedures

##### 6.1.1. For non-emergency personnel

- Emergency procedures : Evacuate unnecessary personnel.

##### 6.1.2. For emergency responders

- Protective equipment : Equip cleanup crew with proper protection.

# COTTON CANDY FRAGRANCE 2662

## Safety Data Sheet

according to Federal Register / Vol. 77, No. 58 / Monday, March 26, 2012 / Rules and Regulations

Emergency procedures : Ventilate area.

### 6.2. Environmental precautions

Prevent entry to sewers and public waters. Notify authorities if liquid enters sewers or public waters. Avoid release to the environment.

### 6.3. Methods and material for containment and cleaning up

Methods for cleaning up : Soak up spills with inert solids, such as clay or diatomaceous earth as soon as possible. Collect spillage. Store away from other materials.

### 6.4. Reference to other sections

See Heading 8. Exposure controls and personal protection.

## SECTION 7: Handling and storage

### 7.1. Precautions for safe handling

Precautions for safe handling : Wash hands and other exposed areas with mild soap and water before eating, drinking or smoking and when leaving work. Provide good ventilation in process area to prevent formation of vapour. Avoid breathing dust/fume/gas/mist/vapours/spray.

Hygiene measures : Do not eat, drink or smoke when using this product. Wash hands thoroughly after handling. Contaminated work clothing should not be allowed out of the workplace. Wash contaminated clothing before reuse.

### 7.2. Conditions for safe storage, including any incompatibilities

Storage conditions : Keep only in the original container in a cool, well ventilated place away from : Keep container closed when not in use.

Incompatible products : Strong bases. Strong acids.

Incompatible materials : Sources of ignition. Direct sunlight.

### 7.3. Specific end use(s)

No additional information available

## SECTION 8: Exposure controls/personal protection

### 8.1. Control parameters

| COTTON CANDY FRAGRANCE 2662      |                                |                     |
|----------------------------------|--------------------------------|---------------------|
| ACGIH                            | Not applicable                 |                     |
| OSHA                             | Not applicable                 |                     |
| ETHYL VANILLIN (121-32-4)        |                                |                     |
| ACGIH                            | Not applicable                 |                     |
| OSHA                             | Not applicable                 |                     |
| ETHYL MALTOL (4940-11-8)         |                                |                     |
| ACGIH                            | Not applicable                 |                     |
| OSHA                             | Not applicable                 |                     |
| p-Methoxybenzaldehyde (123-11-5) |                                |                     |
| ACGIH                            | Not applicable                 |                     |
| OSHA                             | Not applicable                 |                     |
| Coumarin (91-64-5)               |                                |                     |
| ACGIH                            | Not applicable                 |                     |
| OSHA                             | Not applicable                 |                     |
| B.H.T. (128-37-0)                |                                |                     |
| ACGIH                            | ACGIH TWA (mg/m <sup>3</sup> ) | 2 mg/m <sup>3</sup> |
| ACGIH                            | Remark (ACGIH)                 | URT irr             |
| OSHA                             | Not applicable                 |                     |
| Benzyl benzoate (120-51-4)       |                                |                     |
| ACGIH                            | Not applicable                 |                     |
| OSHA                             | Not applicable                 |                     |

# COTTON CANDY FRAGRANCE 2662

## Safety Data Sheet

according to Federal Register / Vol. 77, No. 58 / Monday, March 26, 2012 / Rules and Regulations

### 8.2. Exposure controls

|                               |                                                                                |
|-------------------------------|--------------------------------------------------------------------------------|
| Personal protective equipment | : Avoid all unnecessary exposure.                                              |
| Hand protection               | : Wear protective gloves/protective clothing/eye protection protective gloves. |
| Eye protection                | : Chemical goggles or safety glasses.                                          |
| Respiratory protection        | : Wear appropriate mask.                                                       |
| Other information             | : Do not eat, drink or smoke during use.                                       |

## SECTION 9: Physical and chemical properties

### 9.1. Information on basic physical and chemical properties

|                                            |                                                                                                                                                                                                                                                                    |
|--------------------------------------------|--------------------------------------------------------------------------------------------------------------------------------------------------------------------------------------------------------------------------------------------------------------------|
| Physical state                             | : Liquid                                                                                                                                                                                                                                                           |
| Colour                                     | : Colourless                                                                                                                                                                                                                                                       |
| Odour                                      | : characteristic                                                                                                                                                                                                                                                   |
| Odour threshold                            | : No data available                                                                                                                                                                                                                                                |
| pH                                         | : No data available                                                                                                                                                                                                                                                |
| Melting point                              | : No data available                                                                                                                                                                                                                                                |
| Freezing point                             | : No data available                                                                                                                                                                                                                                                |
| Boiling point                              | : No data available                                                                                                                                                                                                                                                |
| Flash point                                | : > 200 °F                                                                                                                                                                                                                                                         |
| Relative evaporation rate (butylacetate=1) | : No data available                                                                                                                                                                                                                                                |
| Flammability (solid, gas)                  | : No data available                                                                                                                                                                                                                                                |
| Explosive limits                           | : No data available                                                                                                                                                                                                                                                |
| Explosive properties                       | : No data available                                                                                                                                                                                                                                                |
| Oxidising properties                       | : No data available                                                                                                                                                                                                                                                |
| Vapour pressure                            | : 0.0865 mm Hg 20°C                                                                                                                                                                                                                                                |
| Relative density                           | : 1.143                                                                                                                                                                                                                                                            |
| Relative vapour density at 20 °C           | : No data available                                                                                                                                                                                                                                                |
| Solubility                                 | : Water: Solubility in water of component(s) of the mixture :<br>• ETHYL VANILLIN: 1 g/100ml (50 °C) • ETHYL MALTOL: 1.8 g/100ml • p-Methoxybenzaldehyde: 0.33 g/100ml • Vanillin: 0.9 g/100ml • B.H.T.: 0.004 g/100ml (20 °C) • Benzyl benzoate: 153 mg/l (20 °C) |
| Log Pow                                    | : No data available                                                                                                                                                                                                                                                |
| Log Kow                                    | : No data available                                                                                                                                                                                                                                                |
| Auto-ignition temperature                  | : No data available                                                                                                                                                                                                                                                |
| Decomposition temperature                  | : No data available                                                                                                                                                                                                                                                |
| Viscosity                                  | : No data available                                                                                                                                                                                                                                                |
| Viscosity, kinematic                       | : No data available                                                                                                                                                                                                                                                |
| Viscosity, dynamic                         | : No data available                                                                                                                                                                                                                                                |

### 9.2. Other information

No additional information available

## SECTION 10: Stability and reactivity

### 10.1. Reactivity

No additional information available

### 10.2. Chemical stability

Not established.

### 10.3. Possibility of hazardous reactions

Not established.

### 10.4. Conditions to avoid

Direct sunlight. Extremely high or low temperatures.

### 10.5. Incompatible materials

Strong acids. Strong bases.

# COTTON CANDY FRAGRANCE 2662

## Safety Data Sheet

according to Federal Register / Vol. 77, No. 58 / Monday, March 26, 2012 / Rules and Regulations

### 10.6. Hazardous decomposition products

fume. Carbon monoxide. Carbon dioxide.

## SECTION 11: Toxicological information

### 11.1. Information on toxicological effects

Acute toxicity : Oral: Harmful if swallowed.

| <b>COTTON CANDY FRAGRANCE 2662</b>      |                                                                                                                        |
|-----------------------------------------|------------------------------------------------------------------------------------------------------------------------|
| ATE US (oral)                           | 1697.615 mg/kg bodyweight                                                                                              |
| <b>ETHYL VANILLIN (121-32-4)</b>        |                                                                                                                        |
| LD50 oral rat                           | 1590 mg/kg (Rat)                                                                                                       |
| LD50 dermal rabbit                      | > 7940 mg/kg (Rabbit)                                                                                                  |
| ATE US (oral)                           | 1590.000 mg/kg bodyweight                                                                                              |
| <b>ETHYL MALTOL (4940-11-8)</b>         |                                                                                                                        |
| LD50 oral rat                           | 1150 mg/kg (Rat)                                                                                                       |
| LD50 dermal rabbit                      | > 5000 mg/kg (Rabbit)                                                                                                  |
| ATE US (oral)                           | 1150.000 mg/kg bodyweight                                                                                              |
| <b>p-Methoxybenzaldehyde (123-11-5)</b> |                                                                                                                        |
| LD50 oral rat                           | 1510 mg/kg (Rat)                                                                                                       |
| LD50 dermal rabbit                      | > 5000 mg/kg (Rabbit)                                                                                                  |
| ATE US (oral)                           | 1510.000 mg/kg bodyweight                                                                                              |
| <b>Coumarin (91-64-5)</b>               |                                                                                                                        |
| ATE US (oral)                           | 500.000 mg/kg bodyweight                                                                                               |
| <b>B.H.T. (128-37-0)</b>                |                                                                                                                        |
| LD50 oral rat                           | 890 mg/kg (Rat; OECD 401: Acute Oral Toxicity; Experimental value; >6000 mg/kg bodyweight; Rat)                        |
| LD50 dermal rat                         | > 2000 mg/kg (Rat; Literature study; OECD 402: Acute Dermal Toxicity; >2000 mg/kg bodyweight; Rat; Experimental value) |
| ATE US (oral)                           | 890.000 mg/kg bodyweight                                                                                               |
| <b>Benzyl benzoate (120-51-4)</b>       |                                                                                                                        |
| LD50 oral rat                           | 1870 mg/kg (Rat; OECD 401: Acute Oral Toxicity; Experimental value; >2000 mg/kg bodyweight; Rat)                       |
| LD50 dermal rat                         | 4400 mg/kg (Rat)                                                                                                       |
| LD50 dermal rabbit                      | 4000 mg/kg (Rabbit; Experimental value; Modification of Draize 1959 method; >2; Rabbit)                                |
| ATE US (oral)                           | 1870.000 mg/kg bodyweight                                                                                              |
| ATE US (dermal)                         | 4000.000 mg/kg bodyweight                                                                                              |

Skin corrosion/irritation : Not classified  
Serious eye damage/irritation : Not classified  
Respiratory or skin sensitisation : May cause an allergic skin reaction.  
Germ cell mutagenicity : Not classified  
Based on available data, the classification criteria are not met  
Carcinogenicity : Not classified

| <b>Coumarin (91-64-5)</b> |                      |
|---------------------------|----------------------|
| IARC group                | 3 - Not classifiable |
| <b>B.H.T. (128-37-0)</b>  |                      |
| IARC group                | 3 - Not classifiable |

Reproductive toxicity : Not classified  
Based on available data, the classification criteria are not met  
Specific target organ toxicity (single exposure) : Not classified  
Specific target organ toxicity (repeated exposure) : Not classified

# COTTON CANDY FRAGRANCE 2662

## Safety Data Sheet

according to Federal Register / Vol. 77, No. 58 / Monday, March 26, 2012 / Rules and Regulations

|                                                     |                                                                                      |
|-----------------------------------------------------|--------------------------------------------------------------------------------------|
| Aspiration hazard                                   | : Not classified                                                                     |
| Potential adverse human health effects and symptoms | : Harmful if swallowed.                                                              |
| Symptoms/injuries after inhalation                  | : May cause an allergic skin reaction.                                               |
| Symptoms/injuries after eye contact                 | : Causes serious eye irritation.                                                     |
| Symptoms/injuries after ingestion                   | : Swallowing a small quantity of this material will result in serious health hazard. |

### SECTION 12: Ecological information

#### 12.1. Toxicity

Ecology - water : Toxic to aquatic life with long lasting effects.

| ETHYL VANILLIN (121-32-4)        |                                                               |
|----------------------------------|---------------------------------------------------------------|
| LC50 fish 1                      | 87.6 mg/l (96 h; Pisces)                                      |
| p-Methoxybenzaldehyde (123-11-5) |                                                               |
| LC50 fish 1                      | 220 mg/l (96 h; Leuciscus idus)                               |
| EC50 Daphnia 1                   | 83 mg/l (48 h; Daphnia magna)                                 |
| Threshold limit algae 1          | 43 mg/l (72 h; Algae)                                         |
| B.H.T. (128-37-0)                |                                                               |
| LC50 fish 1                      | 0.199 mg/l (96 h; Pisces)                                     |
| EC50 Daphnia 1                   | 0.48 mg/l (48 h; Daphnia magna; GLP)                          |
| Threshold limit algae 1          | > 0.4 mg/l (72 h; Scenedesmus subspicatus; GLP)               |
| Threshold limit algae 2          | 0.363 mg/l (Algae; Chronic)                                   |
| Benzyl benzoate (120-51-4)       |                                                               |
| LC50 fish 1                      | 4.6 mg/l (96 h; Pisces; GLP)                                  |
| EC50 Daphnia 1                   | 426 mg/l (24 h; Daphnia magna; Locomotor effect)              |
| LC50 fish 2                      | 2.32 mg/l (96 h; Brachydanio rerio)                           |
| EC50 Daphnia 2                   | 309 mg/l (48 h; Daphnia magna; Locomotor effect)              |
| Threshold limit algae 1          | 647 mg/l (72 h; Pseudokirchneriella subcapitata; Biomass)     |
| Threshold limit algae 2          | 247 mg/l (72 h; Pseudokirchneriella subcapitata; Growth rate) |

#### 12.2. Persistence and degradability

| COTTON CANDY FRAGRANCE 2662      |                                                                                                                                                      |
|----------------------------------|------------------------------------------------------------------------------------------------------------------------------------------------------|
| Persistence and degradability    | May cause long-term adverse effects in the environment.                                                                                              |
| ETHYL VANILLIN (121-32-4)        |                                                                                                                                                      |
| Persistence and degradability    | Readily biodegradable in water. Forming sediments in water. Photodegradation in the air. Not established.                                            |
| ThOD                             | 1.81 g O <sub>2</sub> /g substance                                                                                                                   |
| BOD (% of ThOD)                  | (5 day(s)) 0.529                                                                                                                                     |
| ETHYL MALTOL (4940-11-8)         |                                                                                                                                                      |
| Persistence and degradability    | Biodegradability in water: no data available.                                                                                                        |
| p-Methoxybenzaldehyde (123-11-5) |                                                                                                                                                      |
| Persistence and degradability    | Readily biodegradable in water.                                                                                                                      |
| Coumarin (91-64-5)               |                                                                                                                                                      |
| Persistence and degradability    | Not established.                                                                                                                                     |
| B.H.T. (128-37-0)                |                                                                                                                                                      |
| Persistence and degradability    | Not readily biodegradable in water. Biodegradable in the soil. Adsorbs into the soil. Low potential for mobility in soil. Photooxidation in the air. |
| Biochemical oxygen demand (BOD)  | 0.51 g O <sub>2</sub> /g substance                                                                                                                   |
| Chemical oxygen demand (COD)     | 2.27 g O <sub>2</sub> /g substance                                                                                                                   |
| ThOD                             | 2.977 g O <sub>2</sub> /g substance                                                                                                                  |
| BOD (% of ThOD)                  | 0.17 % ThOD                                                                                                                                          |
| Benzyl benzoate (120-51-4)       |                                                                                                                                                      |
| Persistence and degradability    | Readily biodegradable in water. Low potential for mobility in soil.                                                                                  |

# COTTON CANDY FRAGRANCE 2662

## Safety Data Sheet

according to Federal Register / Vol. 77, No. 58 / Monday, March 26, 2012 / Rules and Regulations

### 12.3. Bioaccumulative potential

| COTTON CANDY FRAGRANCE 2662      |                                                                   |
|----------------------------------|-------------------------------------------------------------------|
| Bioaccumulative potential        | Not established.                                                  |
| ETHYL VANILLIN (121-32-4)        |                                                                   |
| Log Pow                          | 1.61 - 1.88                                                       |
| Bioaccumulative potential        | Low potential for bioaccumulation (Log Kow < 4). Not established. |
| ETHYL MALTOL (4940-11-8)         |                                                                   |
| Bioaccumulative potential        | No bioaccumulation data available.                                |
| p-Methoxybenzaldehyde (123-11-5) |                                                                   |
| Log Pow                          | 1.5                                                               |
| Bioaccumulative potential        | Low potential for bioaccumulation (Log Kow < 4).                  |
| Coumarin (91-64-5)               |                                                                   |
| Bioaccumulative potential        | Not established.                                                  |
| B.H.T. (128-37-0)                |                                                                   |
| BCF fish 1                       | 230 - 2500 (56 days; Cyprinus carpio)                             |
| Log Pow                          | 5.1 (Experimental value)                                          |
| Bioaccumulative potential        | Potential for bioaccumulation (500 ≤ BCF ≤ 5000).                 |
| Benzyl benzoate (120-51-4)       |                                                                   |
| BCF fish 1                       | 2286 (Pisces)                                                     |
| Log Pow                          | 3.88 - 4                                                          |
| Bioaccumulative potential        | Low potential for bioaccumulation (Log Kow < 4).                  |

### 12.4. Mobility in soil

| B.H.T. (128-37-0)          |                                                               |
|----------------------------|---------------------------------------------------------------|
| Ecology - soil             | May be harmful to plant growth, blooming and fruit formation. |
| Benzyl benzoate (120-51-4) |                                                               |
| Surface tension            | 0.027 N/m (210 °C)                                            |

### 12.5. Other adverse effects

|                              |                                                      |
|------------------------------|------------------------------------------------------|
| Effect on the global warming | : No known ecological damage caused by this product. |
| Other information            | : Avoid release to the environment.                  |

## SECTION 13: Disposal considerations

### 13.1. Waste treatment methods

|                                |                                                                                                                                                   |
|--------------------------------|---------------------------------------------------------------------------------------------------------------------------------------------------|
| Waste disposal recommendations | : Dispose in a safe manner in accordance with local/national regulations. Dispose in a safe manner in accordance with local/national regulations. |
| Ecology - waste materials      | : Avoid release to the environment.                                                                                                               |

## SECTION 14: Transport information

### Department of Transportation (DOT) (Non Bulk only)

In accordance with DOT  
Not regulated for transport

### Additional information

Other information : No supplementary information available.

### ADR

|                                           |                                                                                              |
|-------------------------------------------|----------------------------------------------------------------------------------------------|
| Transport document description            | : UN 3082 ENVIRONMENTALLY HAZARDOUS SUBSTANCE, LIQUID, N.O.S. (BENZYL BENZOATE), 9, III, (E) |
| Packing group (ADR)                       | : III                                                                                        |
| Class (ADR)                               | : 9 - Miscellaneous dangerous substances and articles                                        |
| Hazard identification number (Kemler No.) | : 90                                                                                         |
| Classification code (ADR)                 | : M6                                                                                         |

# COTTON CANDY FRAGRANCE 2662

## Safety Data Sheet

according to Federal Register / Vol. 77, No. 58 / Monday, March 26, 2012 / Rules and Regulations

Danger labels (ADR) : 9 - Miscellaneous dangerous substances and articles

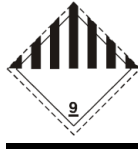

Orange plates

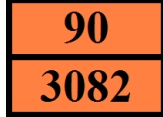

Tunnel restriction code (ADR) : E  
Limited quantities (ADR) : 5I  
Excepted quantities (ADR) : E1

### Transport by sea

UN-No. (IMDG) : 3082  
Proper Shipping Name (IMDG) : ENVIRONMENTALLY HAZARDOUS SUBSTANCE, LIQUID, N.O.S.  
Class (IMDG) : 9 - Miscellaneous dangerous substances and articles  
Packing group (IMDG) : III - substances presenting low danger

### Air transport

UN-No.(IATA) : 3082  
Proper Shipping Name (IATA) : Environmentally hazardous substance, liquid, n.o.s.  
Class (IATA) : 9 - Miscellaneous Dangerous Goods  
Packing group (IATA) : III - Minor Danger

## SECTION 15: Regulatory information

### 15.1. US Federal regulations

#### ETHYL VANILLIN (121-32-4)

Listed on the United States TSCA (Toxic Substances Control Act) inventory

#### ETHYL MALTOL (4940-11-8)

Listed on the United States TSCA (Toxic Substances Control Act) inventory

#### p-Methoxybenzaldehyde (123-11-5)

Listed on the United States TSCA (Toxic Substances Control Act) inventory

#### Coumarin (91-64-5)

Listed on the United States TSCA (Toxic Substances Control Act) inventory

#### B.H.T. (128-37-0)

Listed on the United States TSCA (Toxic Substances Control Act) inventory

#### Benzyl benzoate (120-51-4)

Listed on the United States TSCA (Toxic Substances Control Act) inventory

### 15.2. International regulations

#### CANADA

No additional information available

#### EU-Regulations

No additional information available

#### Classification according to Regulation (EC) No. 1272/2008 [CLP]

|                     |      |
|---------------------|------|
| Acute Tox. 4 (Oral) | H302 |
| Eye Irrit. 2        | H319 |
| Skin Sens. 1        | H317 |
| Aquatic Chronic 2   | H411 |

Full text of H-phrases: see section 16

#### Classification according to Directive 67/548/EEC [DSD] or 1999/45/EC [DPD]

No additional information available



# COTTON CANDY FRAGRANCE 2662

## Safety Data Sheet

according to Federal Register / Vol. 77, No. 58 / Monday, March 26, 2012 / Rules and Regulations

### National regulations

No additional information available

### 15.3. US State regulations

#### B.H.T. (128-37-0)

U.S. - New Jersey - Right to Know Hazardous Substance List

## SECTION 16: Other information

Data sources : REGULATION (EC) No 1272/2008 OF THE EUROPEAN PARLIAMENT AND OF THE COUNCIL of 16 December 2008 on classification, labelling and packaging of substances and mixtures, amending and repealing Directives 67/548/EEC and 1999/45/EC, and amending Regulation (EC) No 1907/2006.

Other information : None.

Full text of H-phrases:

|                     |                                                                   |
|---------------------|-------------------------------------------------------------------|
| Acute Tox. 4 (Oral) | Acute toxicity (oral), Category 4                                 |
| Aquatic Acute 1     | Hazardous to the aquatic environment — Acute Hazard, Category 1   |
| Aquatic Acute 2     | Hazardous to the aquatic environment — Acute Hazard, Category 2   |
| Aquatic Acute 3     | Hazardous to the aquatic environment — Acute Hazard, Category 3   |
| Aquatic Chronic 1   | Hazardous to the aquatic environment — Chronic Hazard, Category 1 |
| Aquatic Chronic 2   | Hazardous to the aquatic environment — Chronic Hazard, Category 2 |
| Skin Irrit. 2       | Skin corrosion/irritation, Category 2                             |
| Skin Sens. 1        | Sensitisation — Skin, category 1                                  |
| Skin Sens. 1B       | Sensitisation — Skin, category 1B                                 |
| H302                | Harmful if swallowed                                              |
| H315                | Causes skin irritation                                            |
| H317                | May cause an allergic skin reaction                               |
| H400                | Very toxic to aquatic life                                        |
| H401                | Toxic to aquatic life                                             |
| H402                | Harmful to aquatic life                                           |
| H410                | Very toxic to aquatic life with long lasting effects              |
| H411                | Toxic to aquatic life with long lasting effects                   |

HMIS III Rating

Health : 1 Slight Hazard - Irritation or minor reversible injury possible

Flammability : 1 Slight Hazard - Materials that must be preheated before ignition will occur. Includes liquids, solids and semi solids having a flash point above 200 F. (Class IIIB)

Physical : 0 Minimal Hazard - Materials that are normally stable, even under fire conditions, and will NOT react with water, polymerize, decompose, condense, or self-react. Non-Explosives.

Personal Protection : B  
B - Safety glasses, Gloves

SDS US (Berje)

*The information contained in this Safety Data Sheet (SDS) was obtained from current and reliable sources. This data is supplied with out warranty expressed or implied, regarding its correctness or accuracy. It is the user's responsibility to determine safe conditions for use of this product and to assume liability for loss, injury, damage or expense resulting from improper use of this product*
